# Supplementary material for: The miR-367-3p Increases Sorafenib Chemotherapy Efficacy to Suppress Hepatocellular Carcinoma Metastasis through Altering the Androgen Receptor Signals
Source: PubMed Central journal article supplement — eBioMedicine. 2016 Jul 14;12:55–67. doi: 10.1016/j.ebiom.2016.07.013 (PMC5078576; doi:10.1016/j.ebiom.2016.07.013), 2016-07-14

# Supplementary Fig 1

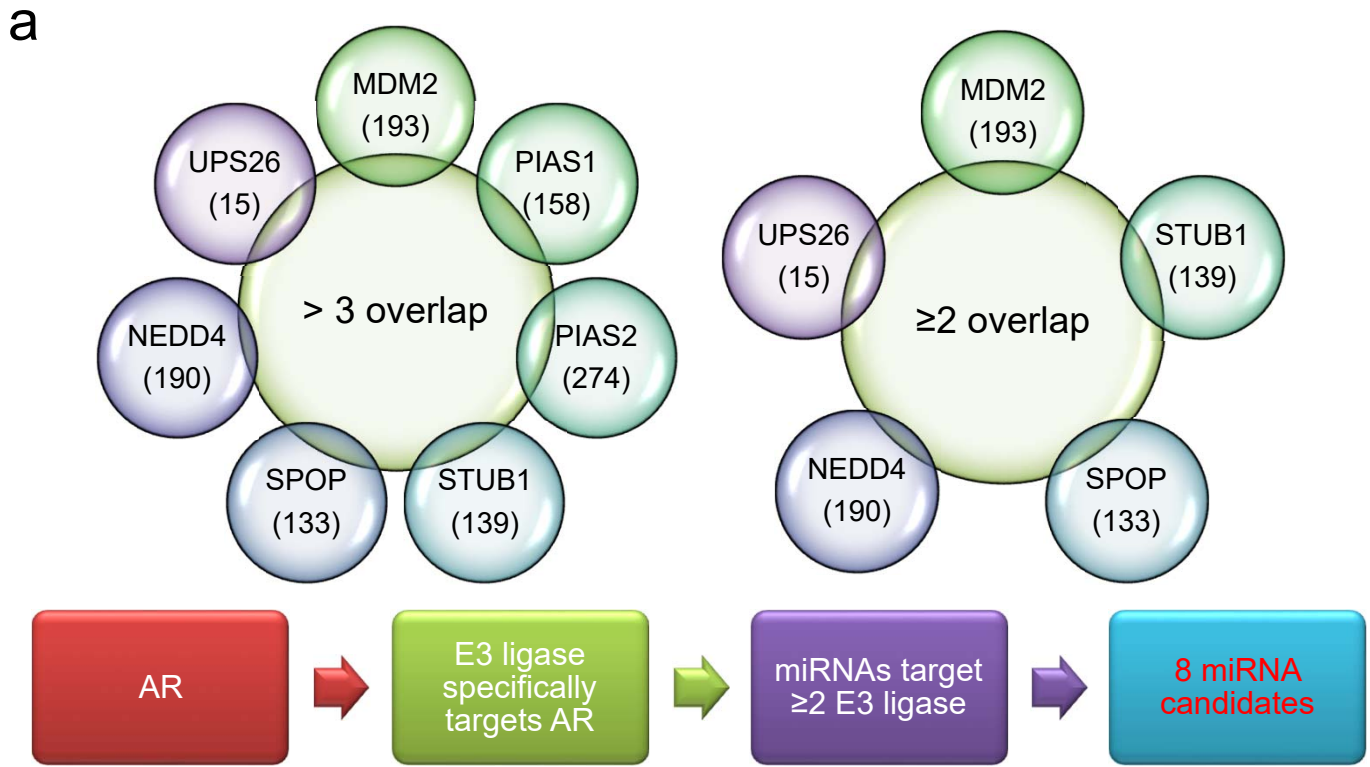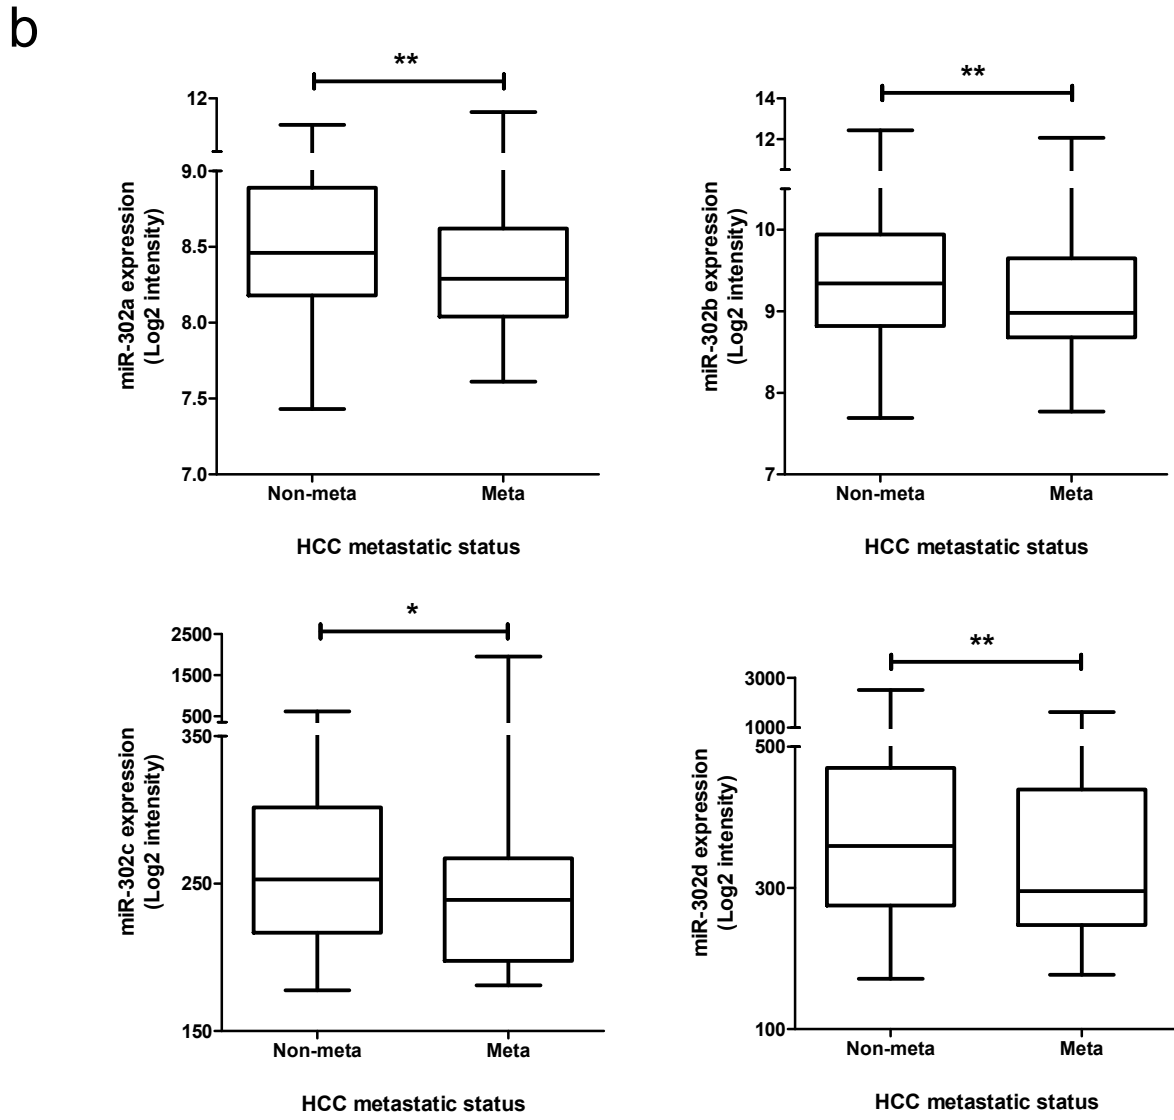

c

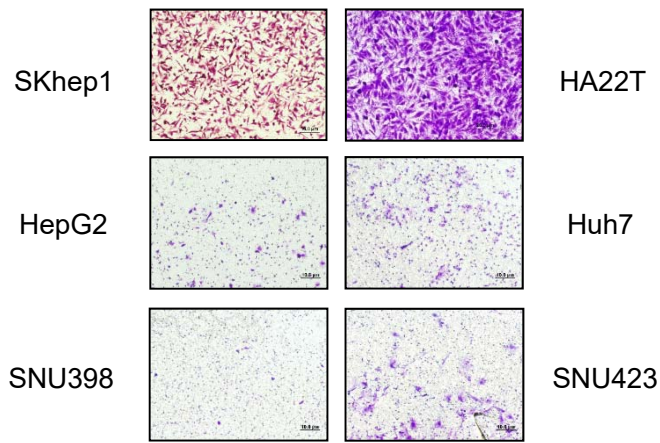

d

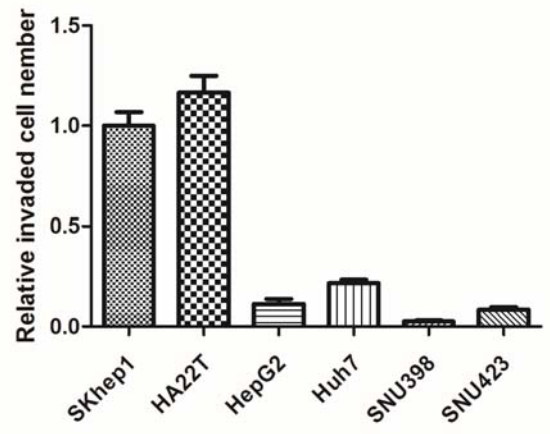

e

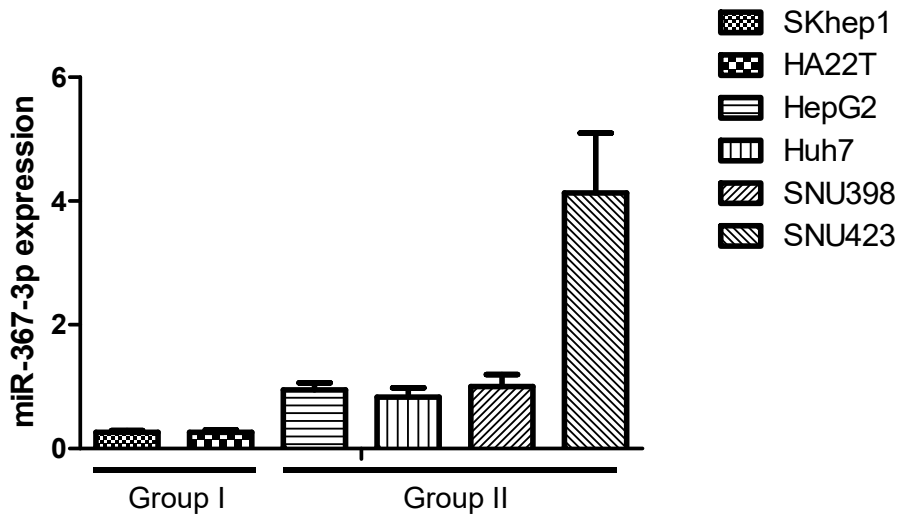

# Supplementary Fig 2

**a**

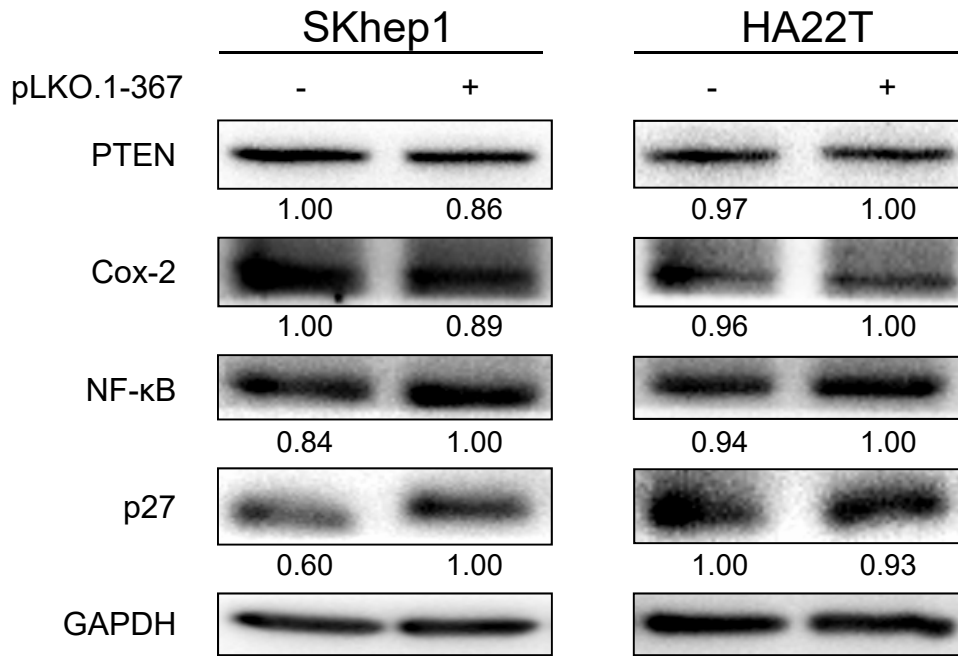

**b**

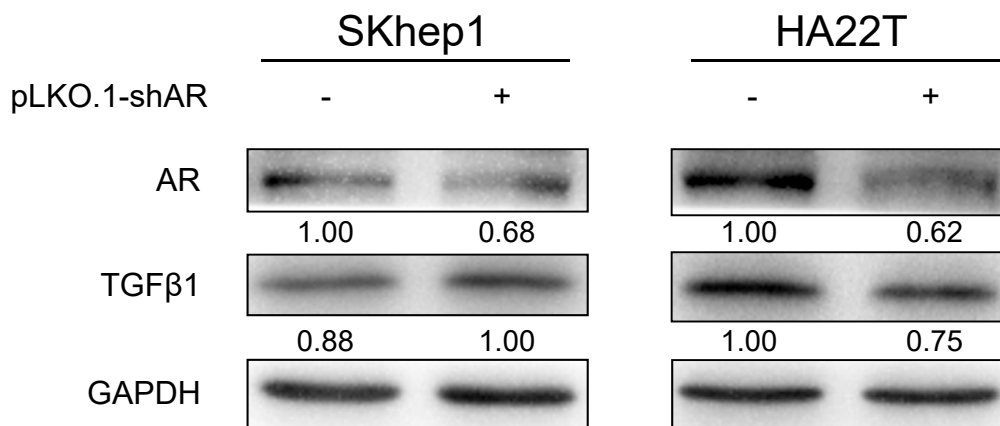

**c**

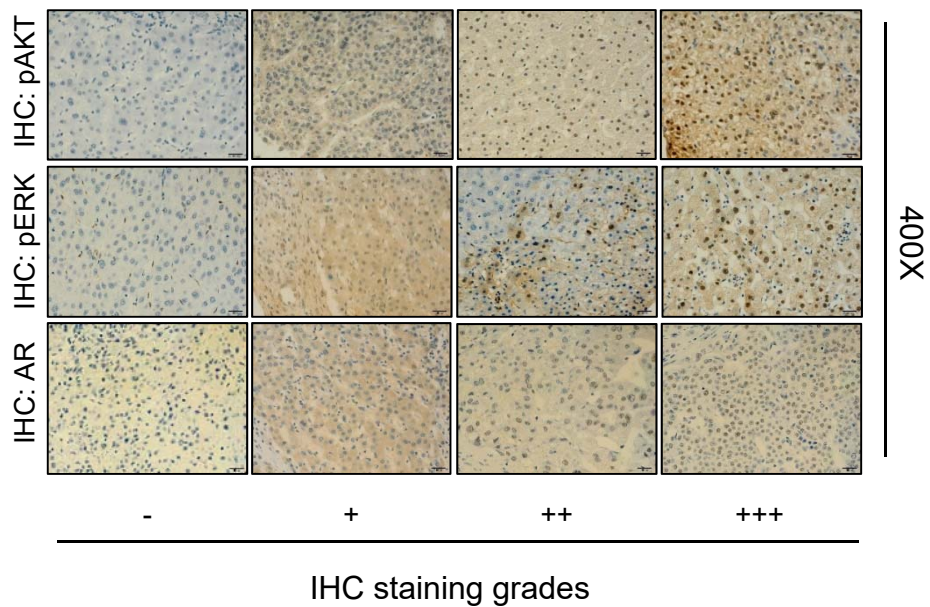

# Supplementary Fig 3

a

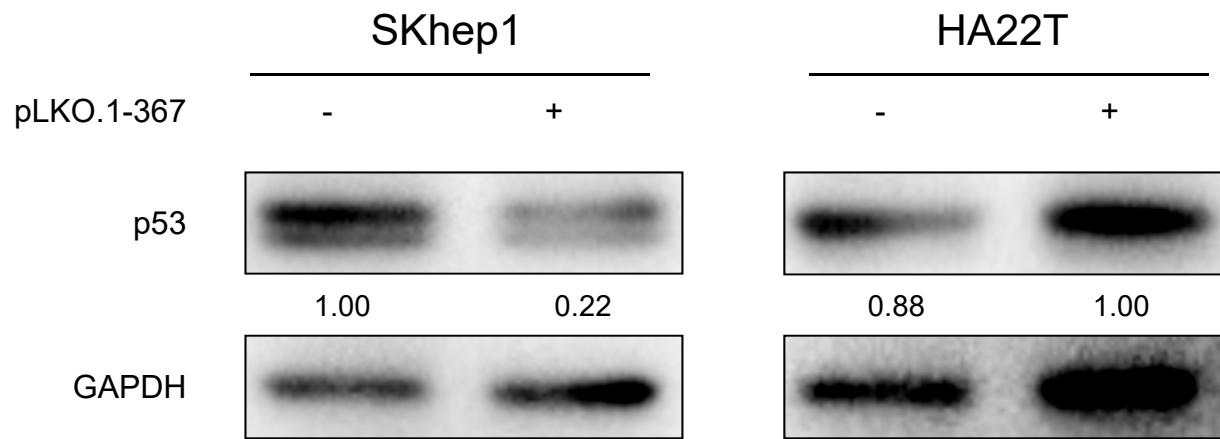

# Supplementary Fig 4

a

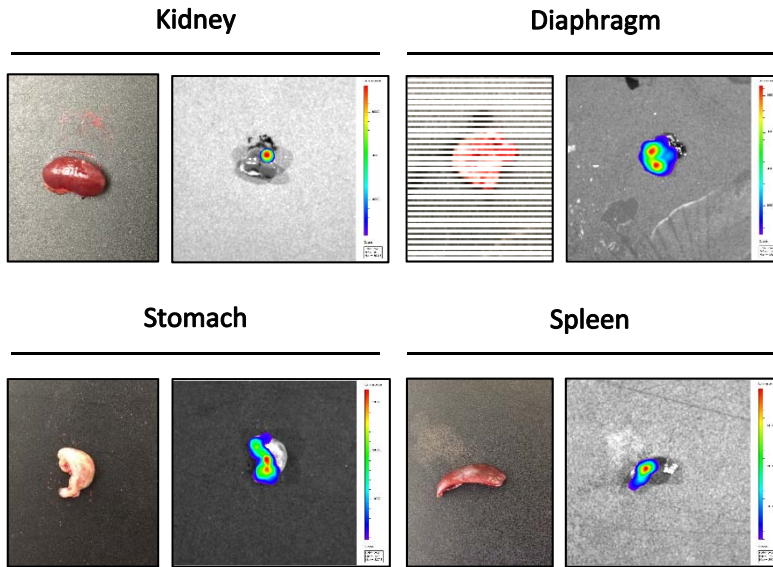

b

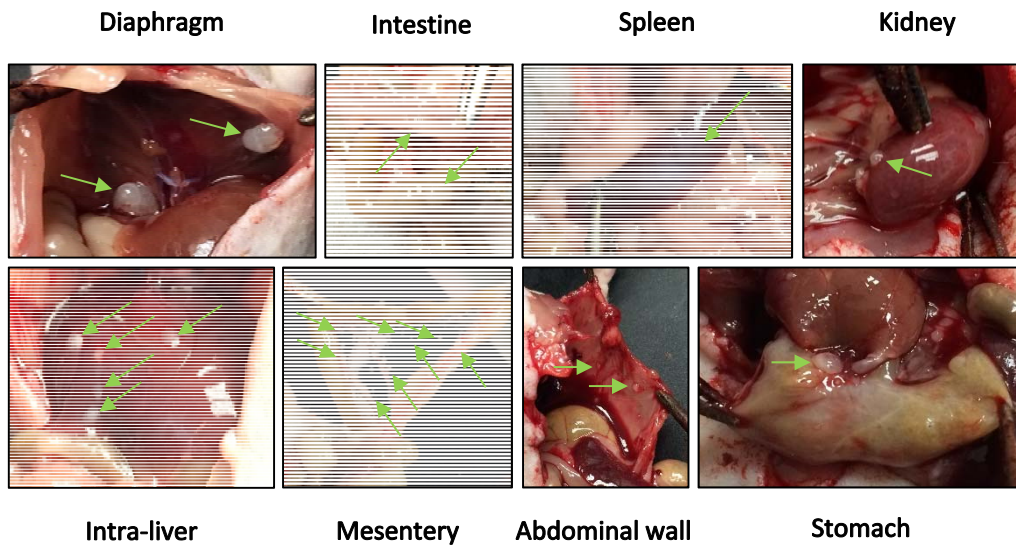

# Supplementary Fig 5

## Fig. 3c

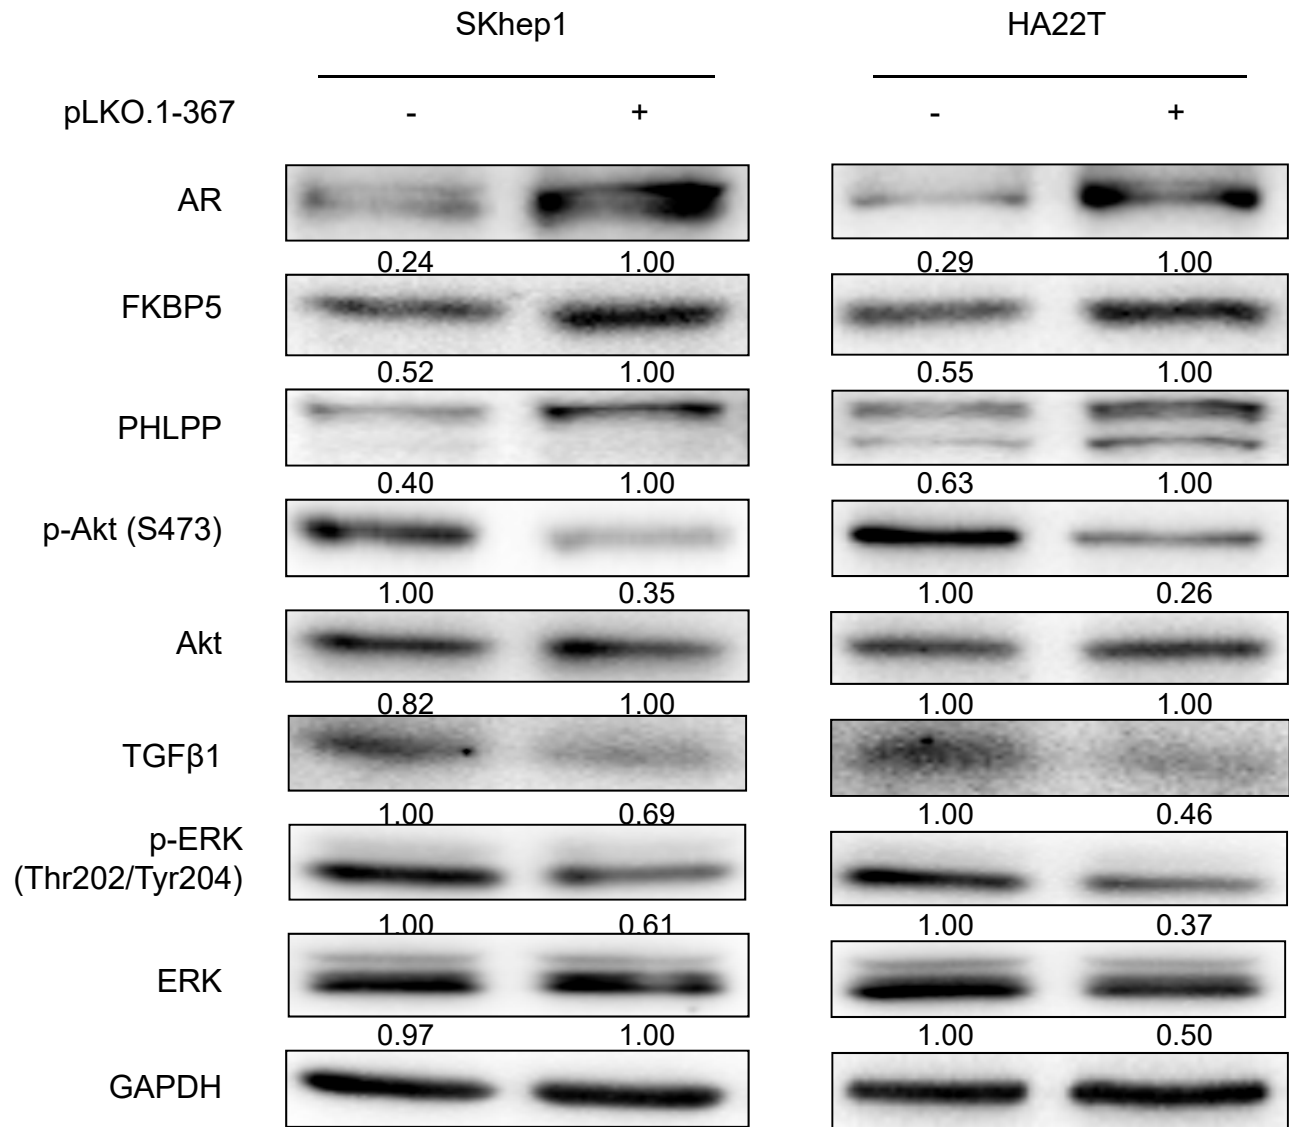

Fig. 3d

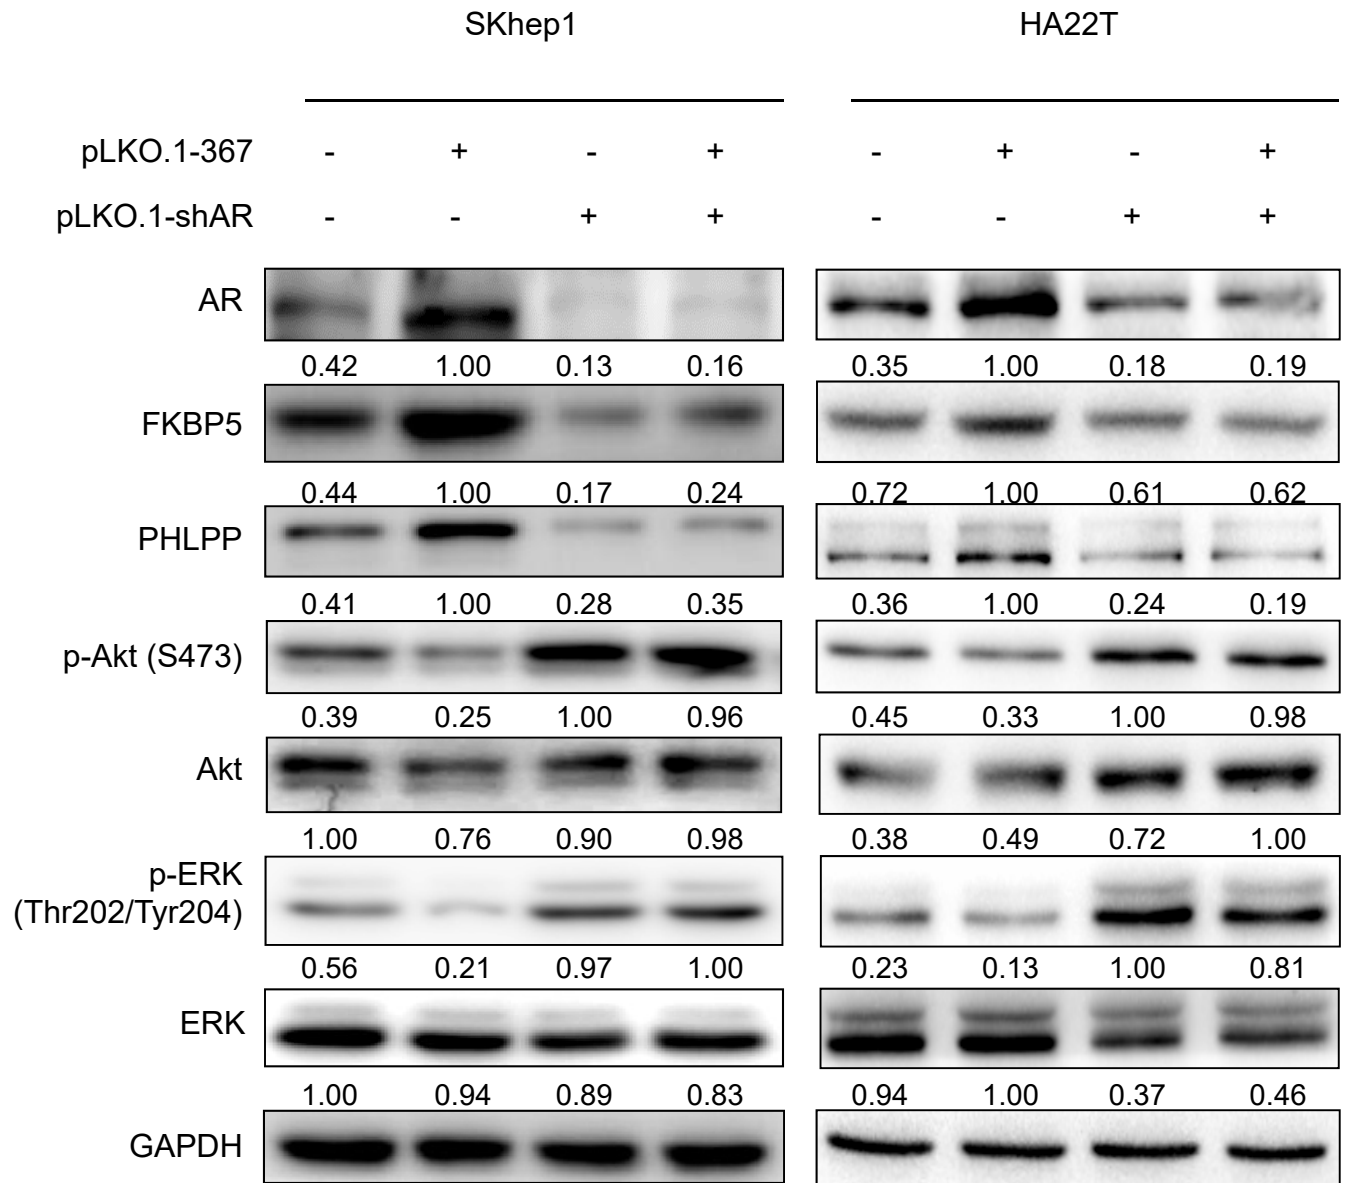

Fig. 3f

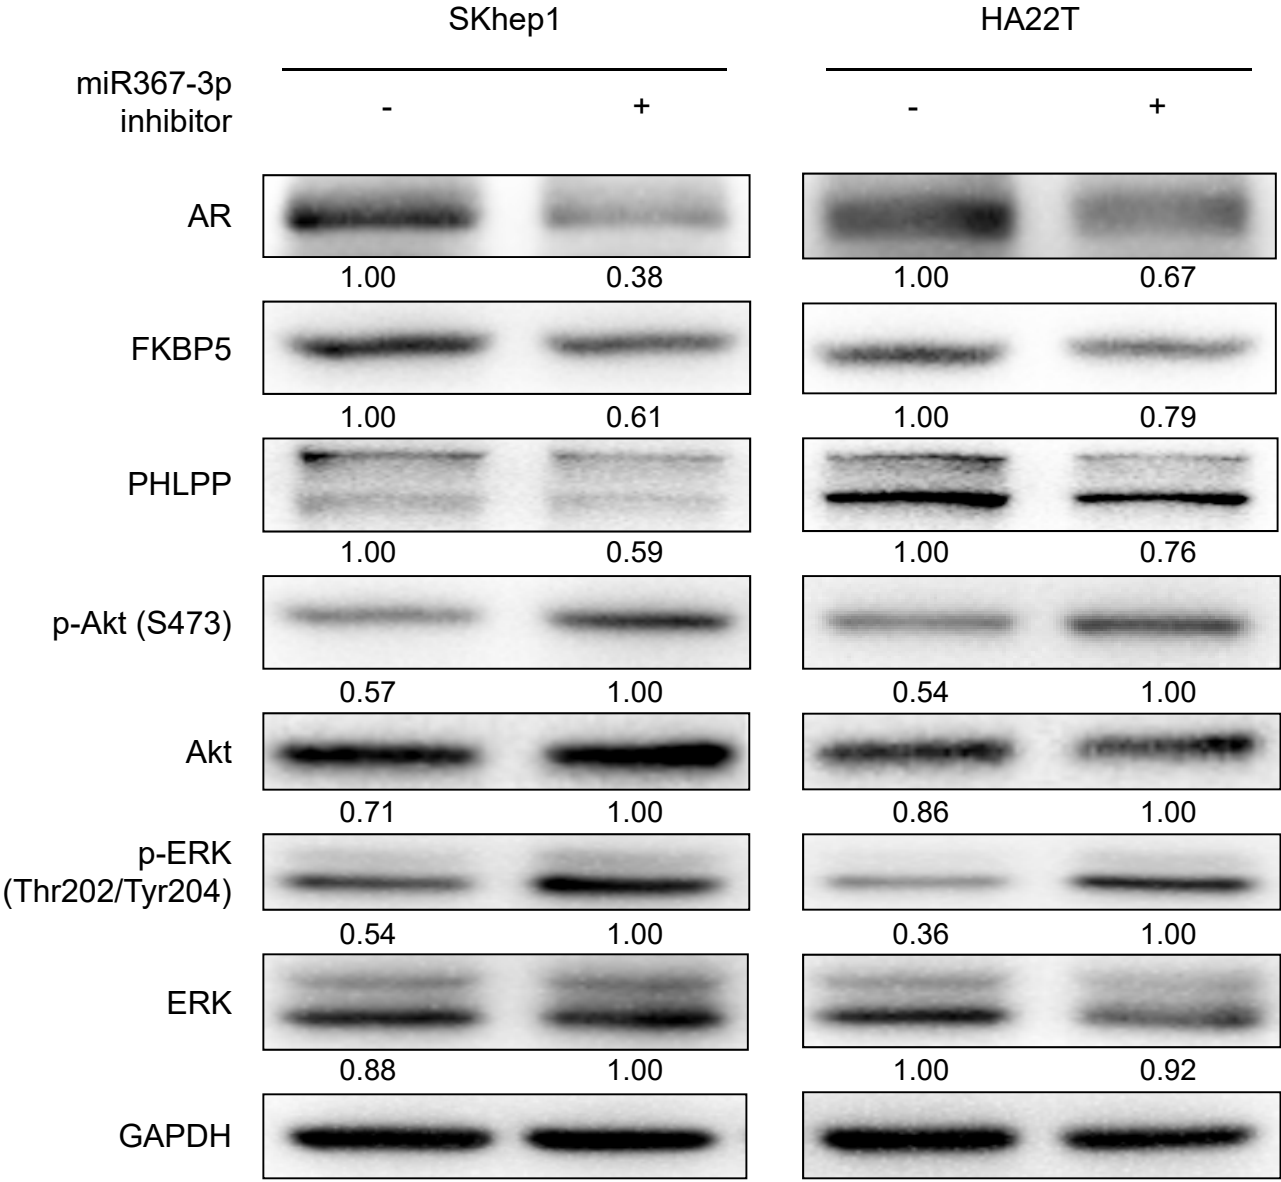



Fig. 4a

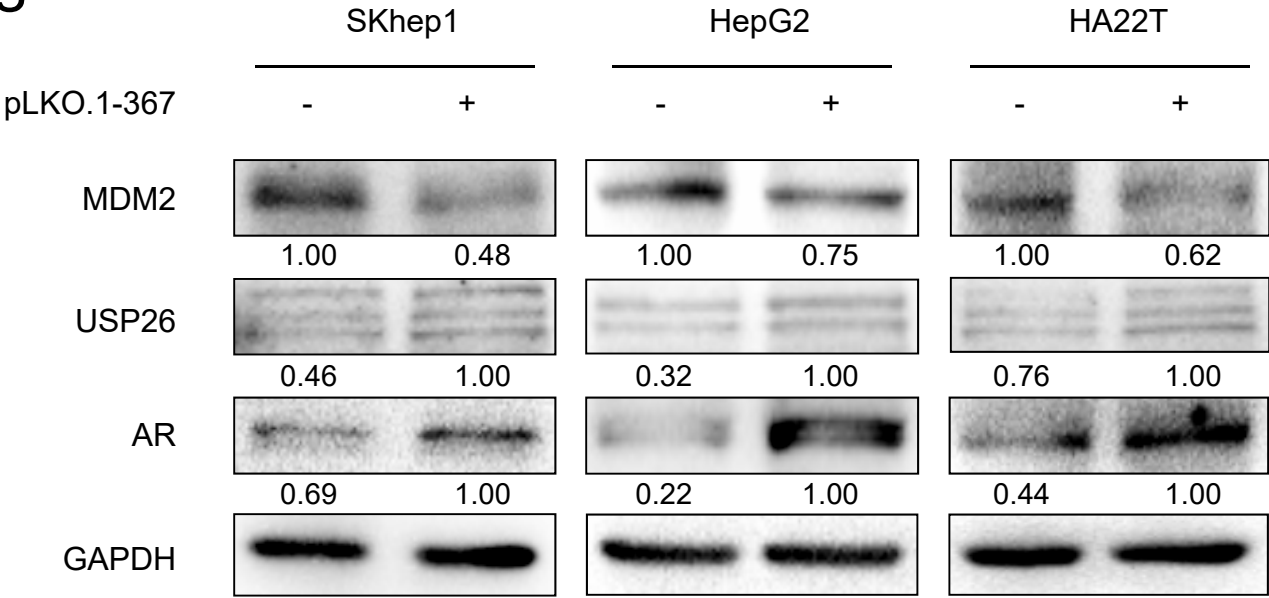

Fig. 4c

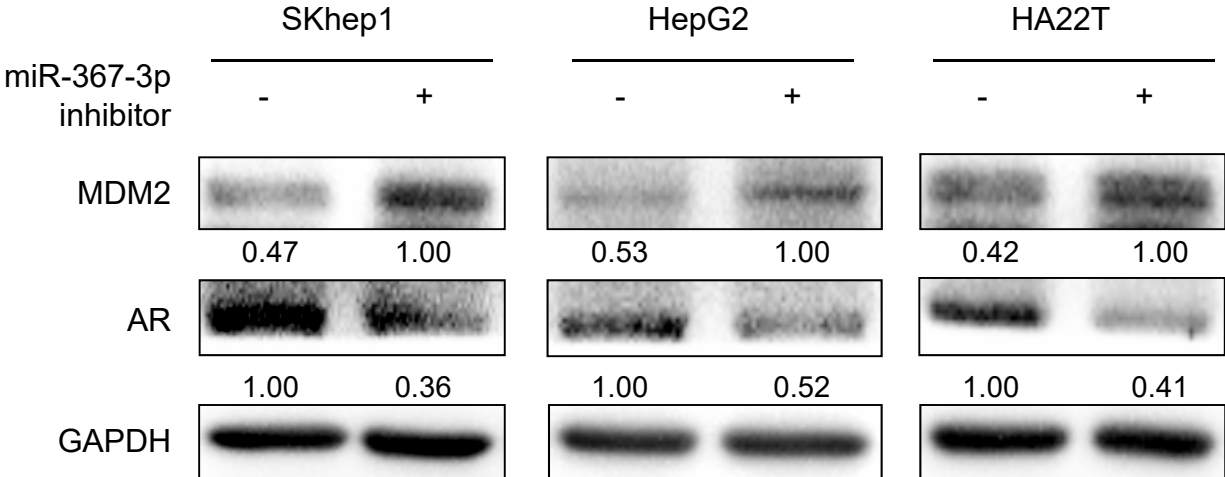

Fig. 4f

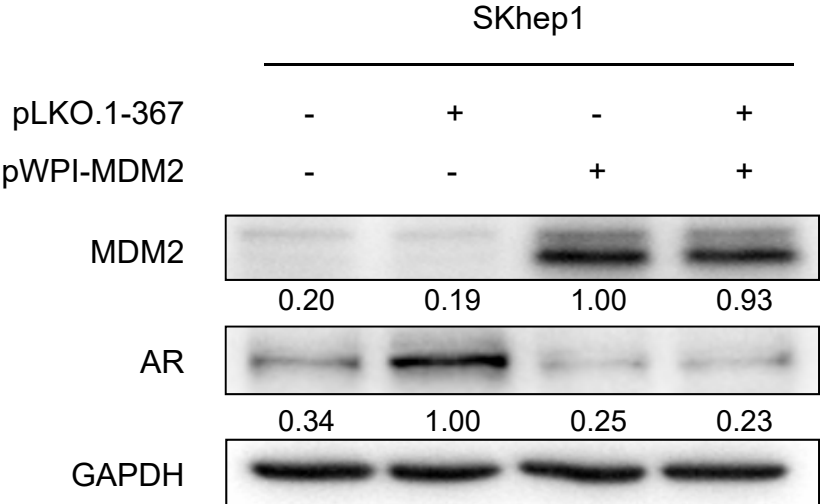

Fig. 5d

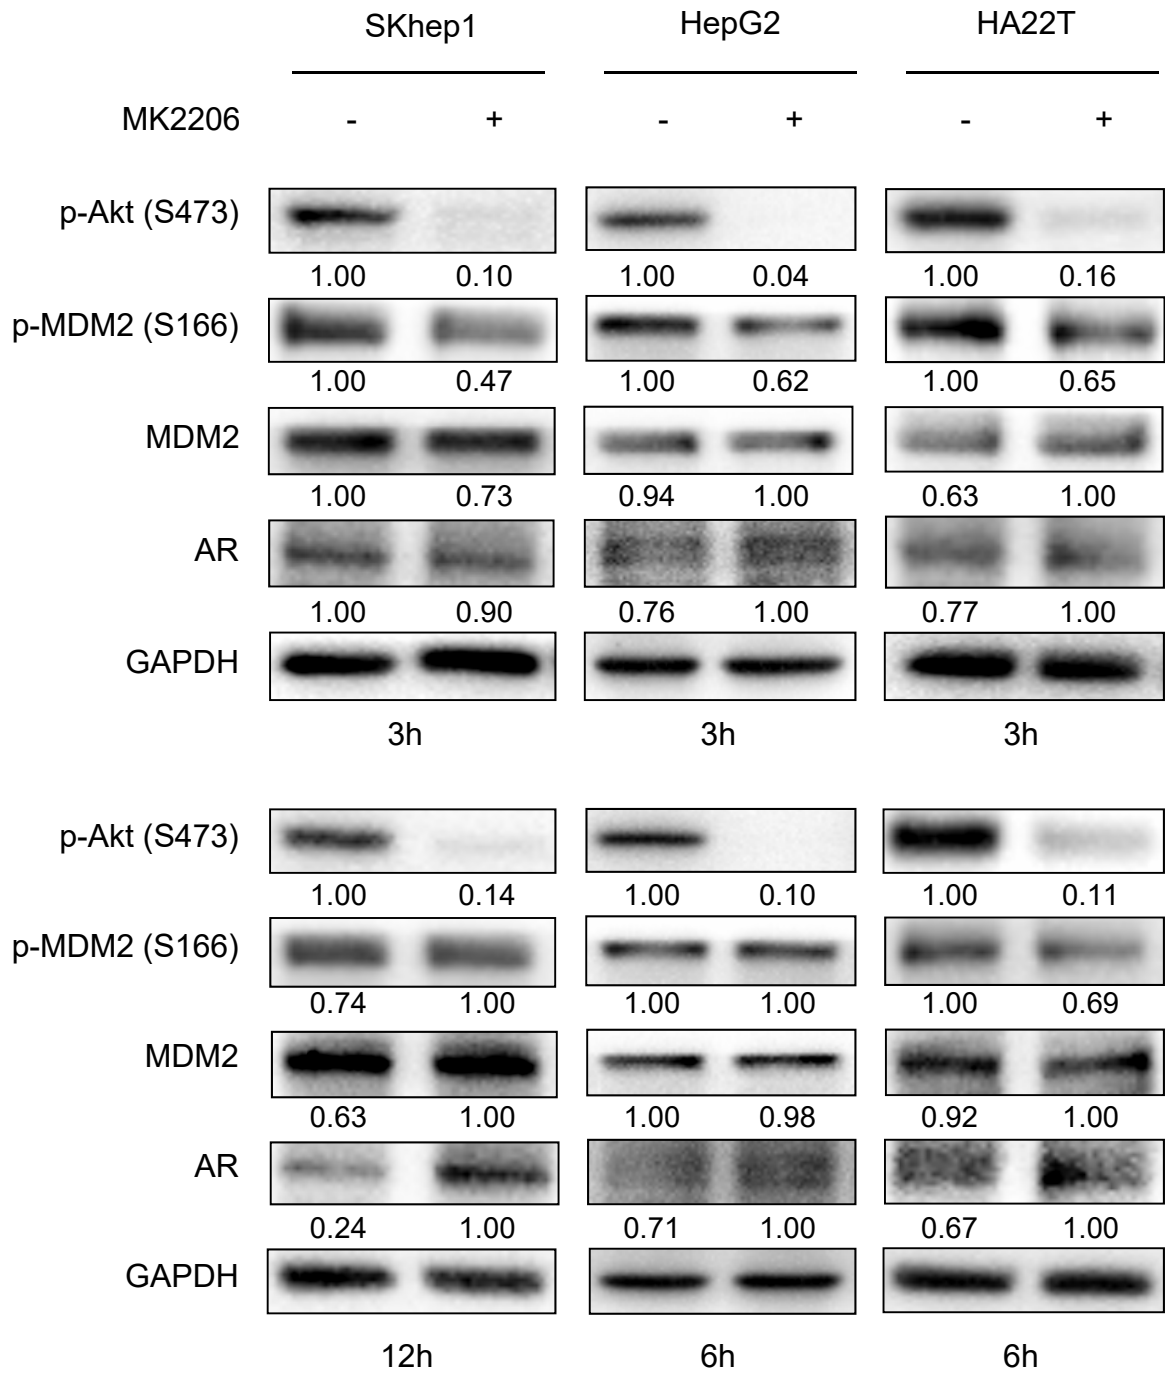

Fig. 5e

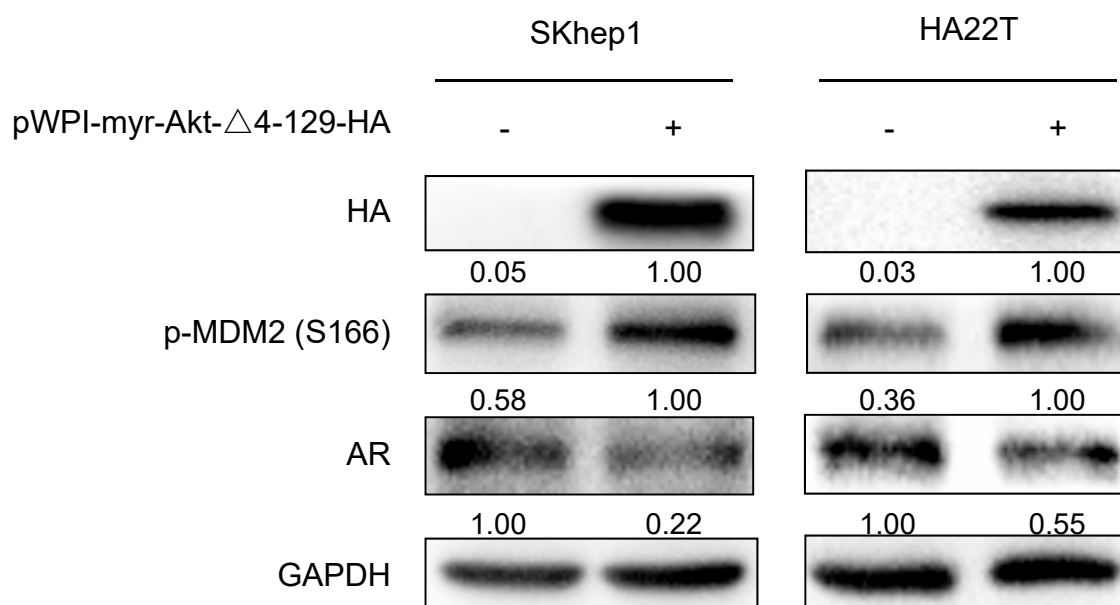

Fig. 6b

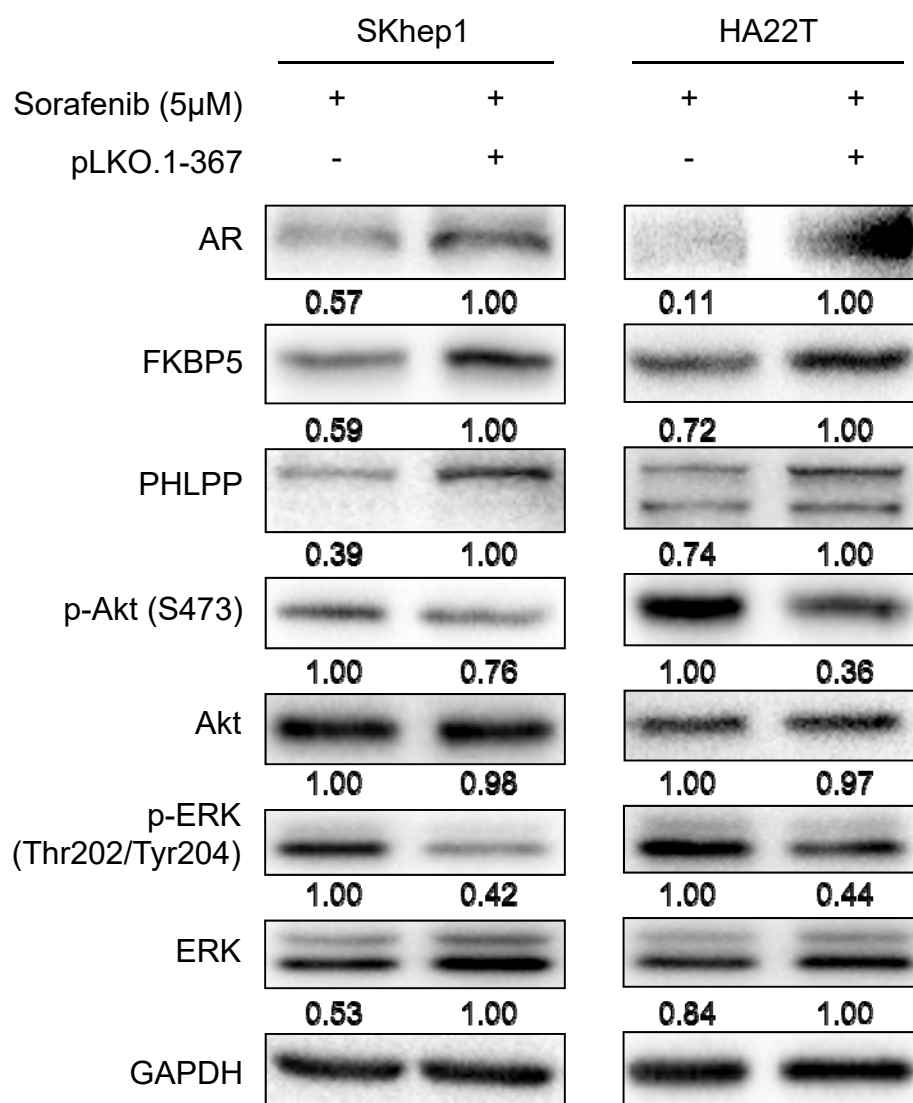

Supplement: mmc1.pdf [file mmc1.pdf]
